# Supplementary material for: The Environment and Reproductive Health (EARTH) Study: a prospective preconception cohort
Source: PubMed Central journal article supplement — Hum Reprod Open. 2018 Feb 20;2018(2):hoy001. doi: 10.1093/hropen/hoy001 (PMC5990043; doi:10.1093/hropen/hoy001), 2018-02-20
Supplement: NIHMS946968-supplement-1.pdf [file NIHMS946968-supplement-1.pdf]

## Supplementary Data

**Figure S1.** Heatmap for adjusted percent change in urinary phthalate metabolite and paraben concentrations associated with self-reported use of personal care products (PCPs) within 24 hours of urine sample collection among 400 men who contributed 1037 urine samples in the EARTH Study.

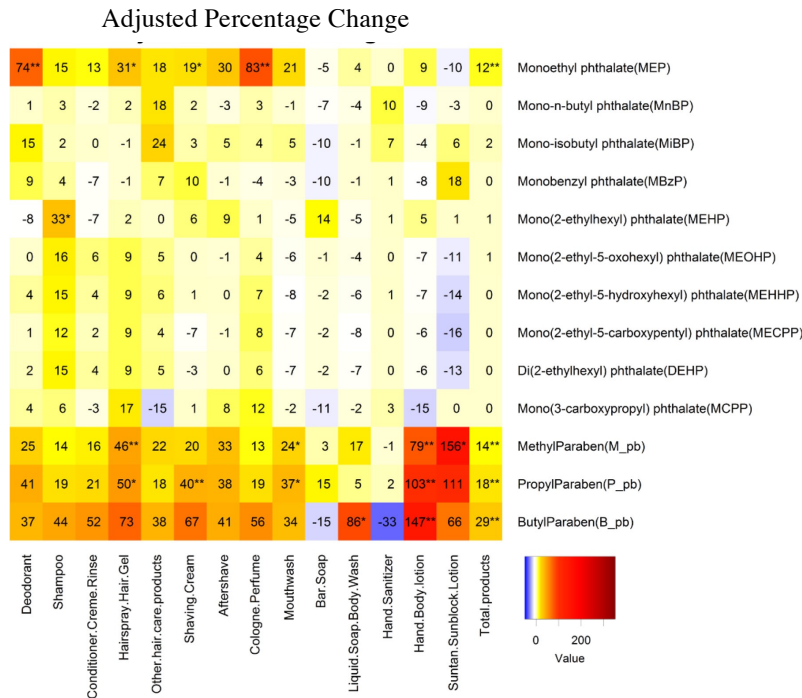

### Notes:

- Statistical significance indicated as \*: if p-value < 0.05, \*\*: if p-value < 0.01.
- DEHP means:  $\sum$ DEHP metabolites ( $\mu\text{mol/L}$ )= sum of  $\mu\text{mol/L}$  of MEHP+ MEOHP+ MEHHP+ MECPP.
- Analysis was based on 10 imputed datasets using chained equations method.
- Multiple imputed missing model based on concordance of product use within persons. For any given PCP at any time point, the imputation model included PCP-use at other time points, urine specific gravity (continuous), race (Caucasian or not), age (continuous), BMI (continuous), calendar year (continuous), time of sample collection (early morning (5am< and <=9am), late morning (9am< and <=12pm) or afternoon(>12pm)), current smoking (yes/no) and warm season (April through September) (yes/no).
- Analysis adjusted for urine specific gravity (continuous), race (Caucasian or not), age (continuous), BMI (continuous), calendar year (continuous), time of sample collection (early morning (5am< and <=9am), late morning (9am< and <=12pm) or afternoon (>12pm)), current smoking (yes/no), warm season (April through September) (yes/no) and the product use within 24 hours (yes/no).
- Total products: the crude sum of PCPs used within 24 hours.
- The last column for the total products represents percent changes associated with each additional type of PCP used, regardless of which PCP.
- Urinary concentrations were ordered according to the molecular weights within phthalates and within parabens.
- Combined other hair care products included mousse, hair bleach, relaxer, perm and straightener.

**Figure S2.** Heatmap of adjusted percent change in specific gravity standardized urinary phthalate metabolite and paraben concentrations with personal care product use in the last 24 hours among pregnant women with a live birth from the EARTH Study.

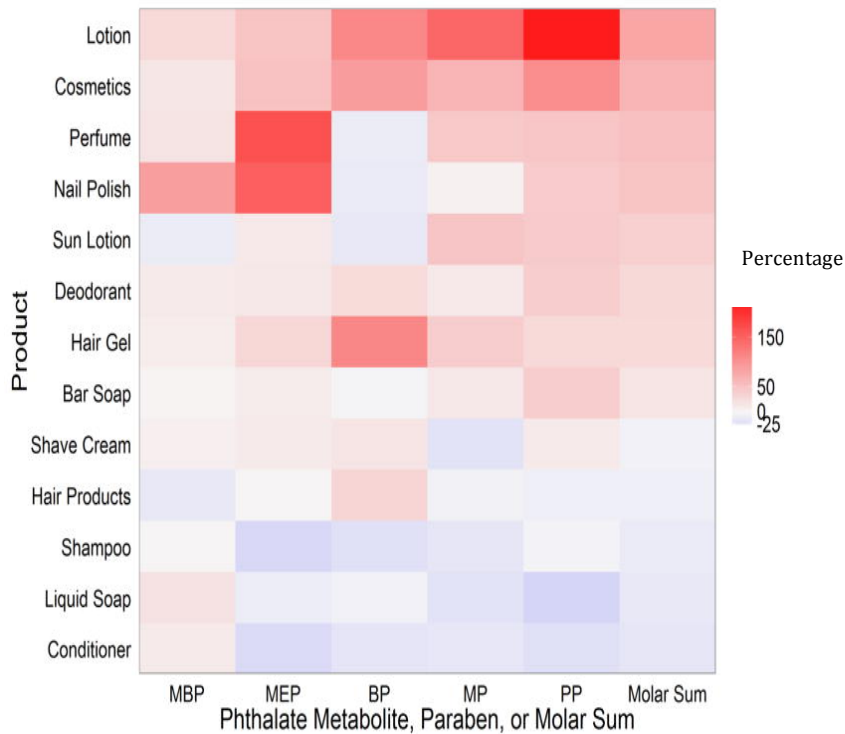

Notes:

- MBP: monobutyl phthalate, MEP: monoethyl phthalate, BP: butyl paraben, MP: methyl paraben, PP: propyl paraben.
- Separate models for each predictor and outcome. Models adjusted for maternal race (white vs. non-white), education (graduate school vs. no graduate school), age (years), body mass index (continuous, time-varying), weeks gestation (time varying), and number of other personal care products used (continuous, time-varying).
- Products are sorted in order of the largest (top) to smallest (bottom) change in the phthalate and paraben molar sum concentrations.
